# Supplementary material
Source: MDPI journal article supplement (https://www.mdpi.com/2071-1050/11/18/4888)
Supplement: s1 [file s1]

## **Supplementary Information**

### **Title: Case Studies for Dangerous Dust Explosions in South Korea during Recent Years**

**Seonggyu Pak <sup>1,†</sup>, Seongho Jung <sup>2,†</sup>, Changhyun Roh <sup>3,4,5</sup> and Chankyu Kang <sup>6,\*</sup>**

<sup>1</sup> Korea Occupational Safety and Health Agency, Major Accident Prevention Center in Chungju, 85 Daerimro, Chungju, Chungbuk 27477, Korea

<sup>2</sup> Department of Environmental and Safety Engineering, Ajou University, Worldcupro 206, Yeongtong-gu, Suwon 16499, Korea

<sup>3</sup> Decommissioning Technology Research Division, Korea Atomic Energy Research Institute (KAERI), 989-111 Daedukdaero, Yuseong, Daejeon 34057, Korea

<sup>4</sup> Advanced Radiation Technology Institute (ARTI), Korea Atomic Energy Research Institute (KAERI), Jeonbuk 56212, Korea

<sup>5</sup> Quantum Energy Chemical Engineering, University of Science and Technology, 217, Gajeong-ro, Yuseong-gu, Daejeon 34113, Korea

<sup>6</sup> Ministry of Labor and Employment, Chemical Accident Prevention Division, 422 Hannuridae-ro, Sejong 30117, Korea

\* Correspondence: chemnet75@korea.kr; Tel.: +82-44-200-2556

† These authors contributed equally to this work.

#### **SI.1. Detailed information of dust explosions in the United States (2016–2017)**

| <b>Cause</b>  | <b>2016</b> | <b>2017</b> | <b>Total</b> | <b>Ratio (%)</b> |
|---------------|-------------|-------------|--------------|------------------|
| Food products | 11          | 48          | 59           | 34               |
| Wood products | 8           | 37          | 45           | 26               |
| Metal         | 3           | 12          | 15           | 9                |
| Plastic       | 0           | 0           | 0            | 0                |
| Coal          | 3           | 0           | 3            | 2                |
| Paper         | 0           | 7           | 7            | 4                |
| Inorganic     | 0           | 0           | 0            | 0                |
| Others        | 6           | 41          | 47           | 27               |
| <b>Total</b>  | <b>31</b>   | <b>145</b>  | <b>176</b>   | <b>100</b>       |

#### **SI.2. Analysis of dust explosions from equipment (2016–2017)**

| <b>Equipment</b>  | <b>2016</b> | <b>2017</b> | <b>Total</b> | <b>Ratio (%)</b> |
|-------------------|-------------|-------------|--------------|------------------|
| Dust collector    | 6           | 24          | 30           | 17               |
| Storage Silo      | 2           | 20          | 22           | 13               |
| Hopper            | 3           | 0           | 3            | 2                |
| Bag house         | 2           | 0           | 2            | 1                |
| Elevator/Conveyor | 3           | 12          | 15           | 9                |
| Other storage     | 0           | 13          | 13           | 7                |
| Others            | 4           | 32          | 36           | 20               |
| No detail         | 11          | 44          | 55           | 31               |
| <b>Total</b>      | <b>31</b>   | <b>145</b>  | <b>176</b>   | <b>100</b>       |
